# Supplementary material
Source: PubMed Central journal article supplement (PMC7369225)
Supplement: NIHMS1599417-supplement-1.pdf [file NIHMS1599417-supplement-1.pdf]

Supplemental Fig. 1

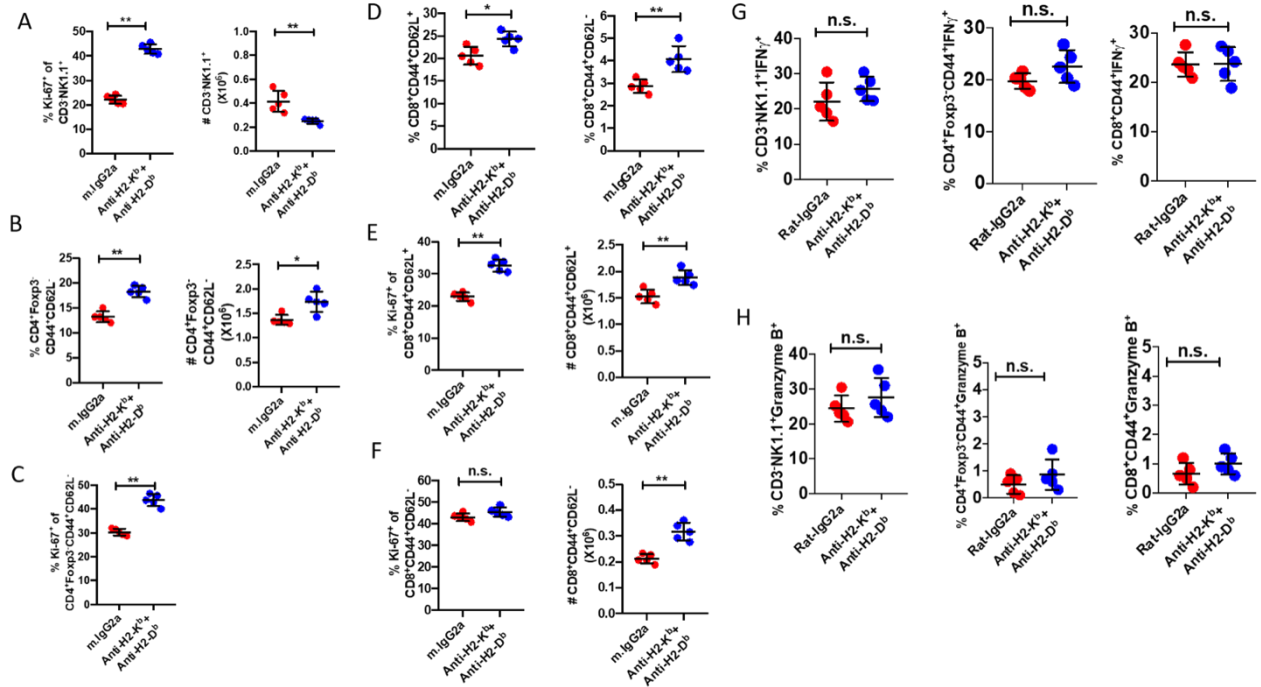

**Supplemental Figure 1.** Anti-H2-K<sup>b</sup> and anti-H2-D<sup>b</sup> co-treatment marginally enhanced NK cell and T cell proliferation. (A) Ki-67 expression and total number of CD3<sup>+</sup>NK1.1<sup>+</sup> splenocytes after 8 days of treatment with mixture of anti H2-K<sup>b</sup> (AF6-88.5) and H2-D<sup>b</sup> (28-14-8). (B) Relative frequency and total number of CD4<sup>+</sup>Foxp3<sup>+</sup>CD44<sup>+</sup>CD62L<sup>-</sup> cells. (C) Relative Ki-67 expression in CD4<sup>+</sup>Foxp3<sup>+</sup>CD44<sup>+</sup>CD62L<sup>-</sup> cells. (D) Relative frequency of CD8<sup>+</sup>CD44<sup>+</sup>CD62L<sup>+</sup> and CD8<sup>+</sup>CD44<sup>+</sup>CD62L<sup>-</sup> cells. (E & F) Relative Ki-67 expression and total no of CD8<sup>+</sup>CD44<sup>+</sup>CD62L<sup>+</sup> and CD8<sup>+</sup>CD44<sup>+</sup>CD62L<sup>-</sup> cells. (G & H) Relative cytokine production (IFN-γ and Granzyme B) from NK cells and MP T cells (CD4 and CD8) on day 8 after antibody co-treatment.

Supplemental Fig.2

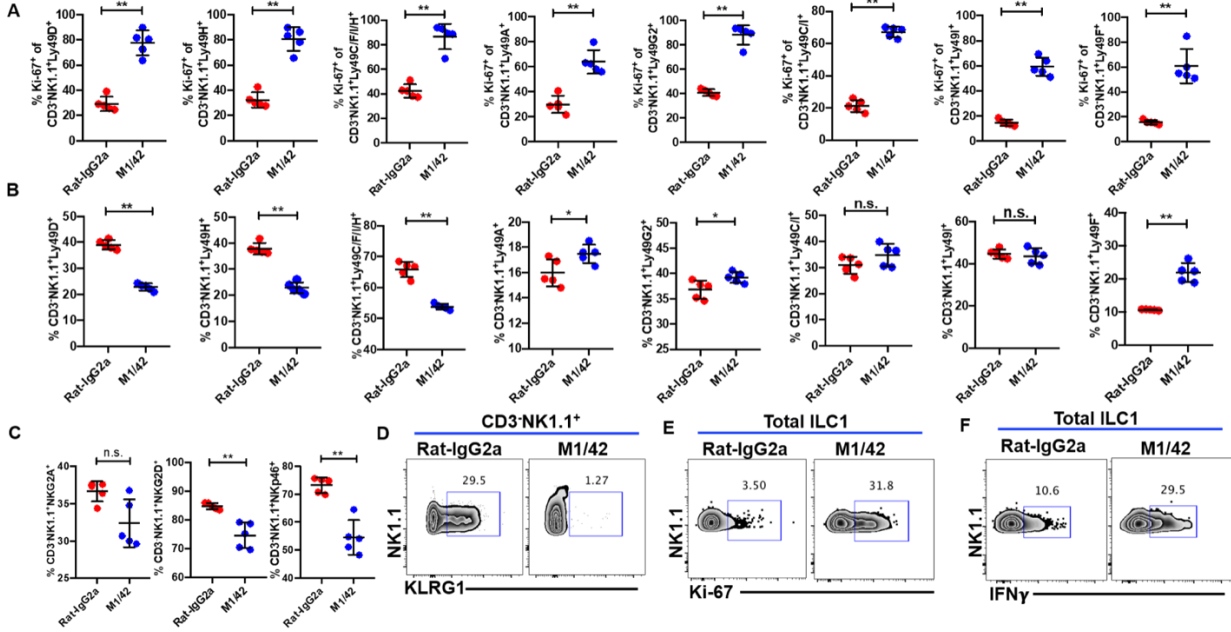

Supplemental Figure 2. M1/42 dramatically enhances NK cell activation in vivo.

(A) Percentage of NK cells expressing inhibitory receptors (Ly49A, Ly49C, Ly49I, Ly49G2, Ly49F) and activation receptors (Ly49D and Ly49H) in splenocytes after M1/42 treatment. (B) Ki-67 expression of CD3<sup>+</sup>NK1.1<sup>+</sup>Ly49<sup>-</sup> (activation and inhibitory) gated NK cell subsets. (C) Surface expression of NKG2A, NKG2D and NKp46 on NK cells (CD3<sup>+</sup>NK1.1<sup>+</sup>) after M1/42 treatment. (D) Frequency of KLRG1 expression in on splenic NK cells after M1/42. (E) Ki67 expression and IFN- $\gamma$  secretion by hepatic ILC1 after M1/42 treatment. The following clones were used: KLRG1 (2F1), NKp46 (29A1.4), NKG2D (1D11), NKG2A (16A11), Ly49A (A1/Ly49A or YE1/48.10.6), Ly49C/I (5E6), Ly49D (4E5), Ly49F (HBF-719), Ly49G2 (4D11), Ly49H (3D10), Ly49C/F/I/H (14B11). All antibodies were purchased from BD Biosciences. Liver ILC1 cells are define as: Live CD45<sup>+</sup>CD3<sup>+</sup>NK1.1<sup>+</sup>ROR $\gamma$ t<sup>-</sup>Gata3<sup>-</sup>Tbet<sup>+</sup> CD49b<sup>-</sup> CD49a<sup>+</sup>.

Supplemental Fig. 3

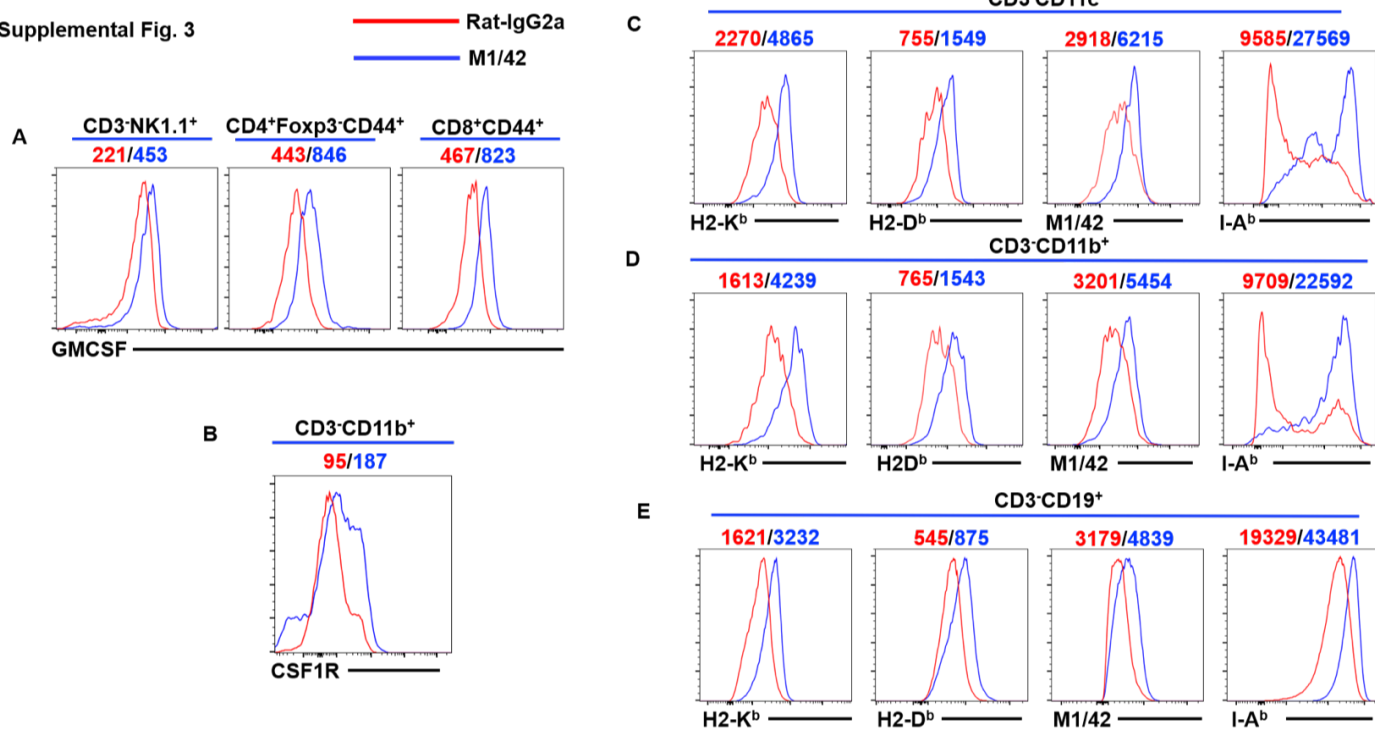

**Supplemental Figure 3.** M1/42 activates GM-CSF production by NK cells and MP CD4<sup>+</sup> and CD8<sup>+</sup> T cells and enhanced expression of MHC-I and MHC-II on APC. C57BL/6 mice were treated with M1/42 or isotype control for six d and spleen cells were harvested on d 8. (A) Spleen cells were treated with PMA and ionomycin and GM-CSF production was measured by intracellular staining on gated NK cells, and MP CD4<sup>+</sup> and CD8<sup>+</sup> T cells. Results are expressed as Mean Fluorescence Intensity (MFI). (B) CSF1R expression (MFI) by monocytes (CD3<sup>+</sup>CD11b<sup>+</sup>) on day 8 after treatment. (C, D, E) MHC-I and MHC-II expression on monocytes (CD3<sup>+</sup>CD11b<sup>+</sup>), DC (CD3<sup>+</sup>CD11c<sup>+</sup>) and B cells (CD3<sup>+</sup>CD19<sup>+</sup>) 8 days after M1/42 treatment.

Supplemental Fig. 4

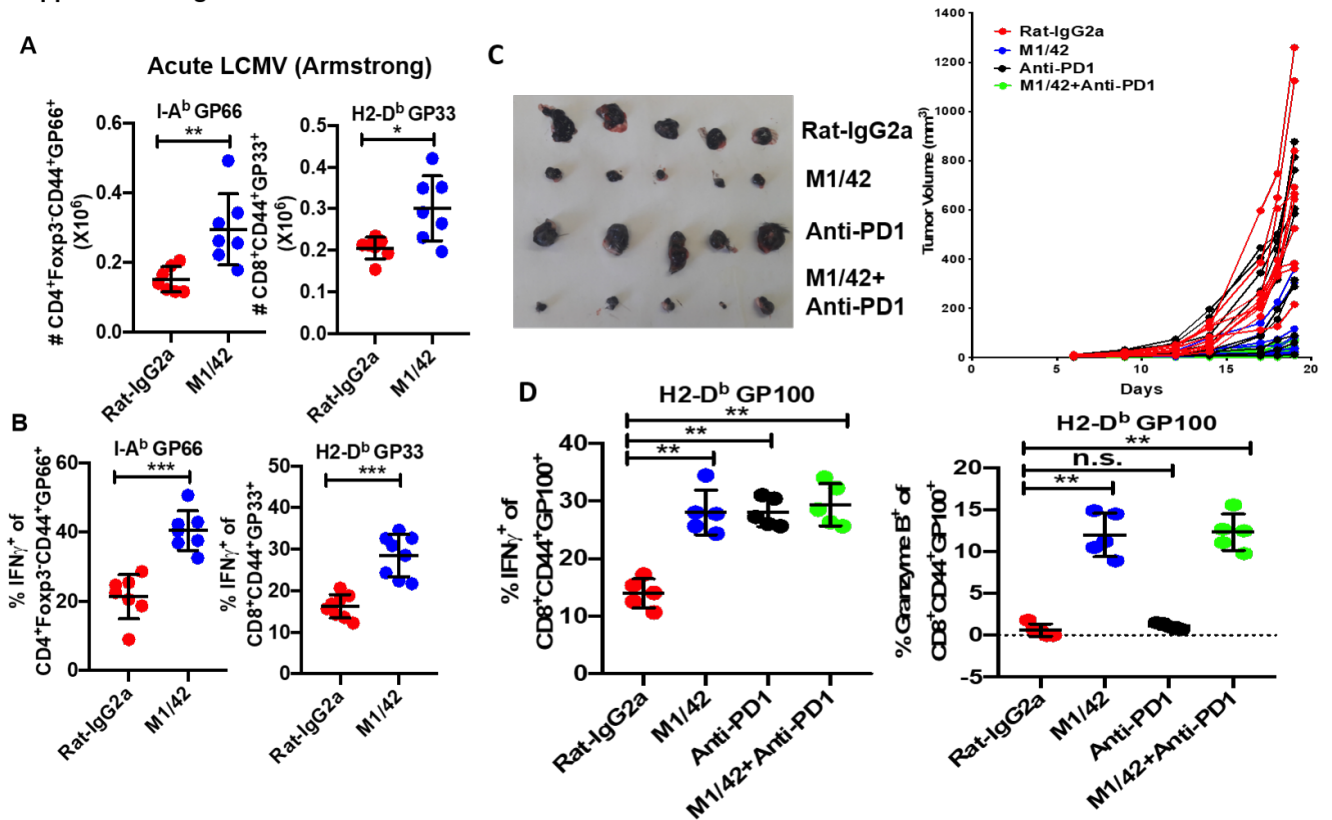

**Supplemental Figure 4.** M1/42 enhances anti-viral and anti-tumor immunity. C57BL/6 mice were infected with LCMV Armstrong and treated with M1/42 (Day-2, 4, 7 and 10) and analyzed on d 15 (A) Total number of antigen-specific MP CD4<sup>+</sup> and CD8<sup>+</sup> T cells. (B) IFN- $\gamma$  production by LCMV-specific MP CD4<sup>+</sup> and CD8<sup>+</sup> T cells after M1/42 treatment. (C) B16F10 tumor cells ( $1.25 \times 10^5$ ) were injected s.c. Mice were treated with M1/42 (500 $\mu$ g/dose), anti-PD-1 (250 $\mu$ g/dose) or anti-PD-1 plus M1/42 every three d from d 3 to day 15. Tumor volume was determined. On d 17 tumor-bearing mice were sacrificed to analyze relative tumor size (left panel) and tumor volume (right panel). (D) Percentage of IFN- $\gamma$  and Granzyme B producing tumor antigen-specific CD8<sup>+</sup>CD44<sup>+</sup>GP100<sup>+</sup> cells after M1/42 or anti-PD1 treatments.
